# Supplementary material for: Systems analysis of circadian time-dependent neuronal epidermal growth factor receptor signaling
Source: Springer Nature journal article supplement (doi:10.1186/gb-2006-7-6-r48), 2006-06-19
Supplement: Additional file 1 [file gb-2006-7-6-r48-s1.doc]

**Supporting figure 1: Select expression responses to EGFR activation in the SCN.** “C” = control during the day, “CN” = control during the night, “E” = EGF treatment during the day, and “EN” = EGF treatment during the night. Boxes indicate maximum, mean, and minimum normalized expression values. Night responses are shaded.
