# Supplementary material for: Systems analysis of circadian time-dependent neuronal epidermal growth factor receptor signaling
Source: Springer Nature journal article supplement (doi:10.1186/gb-2006-7-6-r48), 2006-06-19
Supplement: Additional file 2 [file gb-2006-7-6-r48-s2.doc]

**Supporting Figure 2: Transcriptional responses of selected TFs to EGFR activation in the SCN as measured by qRT-PCR.** Shown are normalized -Ct values (~log2 normalized expression levels – see Materials & Methods) for different experimental conditions for *c-Jun*, *c-Ets1*, *Creb1*, *c/EBP,* *c/EBP*, and *c/EBP*. “C” = control during the day, “CN” = control during the night, “E” = EGF treatment during the day, and “EN” = EGF treatment during the night. Night responses are shaded. *C-Jun* and *C/EBP* are consistently down-regulated during both day and night, *c-Ets1* and *Creb1* are both down-regulated during the day and up-regulated during the night, *c/EBP* is consistently up-regulated during the night, and *c/EBP* is consistently down-regulated during the day only. *C/EBP* transcripts were not detected in “*Rat e*” samples.
